# Supplementary material
Source: publisher figshare collection journal article supplement (https://tandf.figshare.com/ndownloader/files/14940716)
Supplement: Supplementary file 1 [file 14940716]

**Supplementary material**

**Trace elements in *Pleurotus ostreatus*, *P. eryngii* and *P. nebrodensis* mushrooms cultivated on various agricultural by-products**

**Aikaterini Sakellaria, Sotirios Karavoltsosa, Dimitra Tagkoulib, Christiana Rizoub, Vassilia J. Sinanoglouc, Panagiotis Zoumpoulakisd, Georgios Koutrotsiose,**

**Georgios I. Zervakise, Nick Kalogeropoulosb[[1]](#footnote-2)***

**a** Laboratory of Environmental Chemistry, Department of Chemistry, National and Kapodistrian University of Athens, Athens, Greece

**b** Department of Nutrition and Dietetics, Harokopio University, Athens, Greece

**c** Department of Food Science & Technology, University of West Attica, Athens, Greece

**d** Institute of Biology, Medicinal Chemistry, and Biotechnology, National Hellenic Research Foundation, Athens, Greece

**e** Laboratory of General and Agricultural Microbiology, Agricultural University of Athens, Athens, Greece

**Table S1.** Certified and determined values (μg g-1) of trace elements concentrations in reference materials.

| Element | ERM®  - CD281 (rye grass) | | | ERM – CE278k (mussel tissue) | | |
| --- | --- | --- | --- | --- | --- | --- |
|  | Certified value | Determined value | % Recovery | Certified value | Determined value | % Recovery |
| As | 0.042 ± 0.010 | 0.04 ± 0.01 | 95 | 6.7 ± 0.4 | 6.5 ± 0.2 | 97 |
| Cd | 0.120 ± 0.007 | 0.13 ± 0.01 | 108 | 0.336 ± 0.025 | 0.34 ± 0.02 | 101 |
| Cr | 24.8 ± 1.3 | 26 ± 2 | 105 | 0.73 ± 0.22 | 0.78 ± 0.31 | 107 |
| Cu | 10.2 ± 0.5 | 11 ± 1 | 108 | 5.98 ± 0.27 | 6.3 ± 0.3 | 105 |
| Fe |  |  |  | 161 ± 8 | 150 ± 7 | 93 |
| Mn | 82 ± 4 | 80 ± 5 | 98 | 4.88 ± 0.24 | 4.7 ± 0.2 | 96 |
| Ni | 15.2 ± 0.6 | 13 ± 1 | 85 | 0.69 ± 0.15 | 0.65 ± 0.11 | 94 |
| Pb | 1.67 ± 0.11 | 1.6 ± 0.2 | 96 | 2.18 ± 0.18 | 2.6 ± 0.2 | 119 |
| Sr |  |  |  | 19.0 ± 1.2 | 19 ± 1 | 100 |
| Zn | 30.5 ± 1.1 | 30 ± 1 | 98 | 71 ± 4 | 72 ± 3 | 101 |

**Table S2.** Percent coverage of established tolerable or adequate intakes for toxic trace elements from the consumption of one serving (30 g) of dry *Pleurotus* mushrooms by a 60 kg adult

| Element | Type of established intake | intake (mg) |  | *P. ostreatus* | |  | *P. eryngii* | |  | *P. nebrodensis* | | Reference |
| --- | --- | --- | --- | --- | --- | --- | --- | --- | --- | --- | --- | --- |
|  | WHS+  GMC | OLV+  OMW |  | WHS+  GMC | OLV+  OMW |  | WHS+  GMC | OLV+  OMW |
|  |  |  |  |  |  |  |  |  |  |  |  |  |
| Al | PTWI | 120 |  | 0.2 | 0.6 |  | 2.0 | 1.5 |  | 2.0 | 2.5 | JECFA 2012 |
| As* | PTWI | 0.9 |  | 0.4 | 1.7 |  | 0.2 | 1.3 |  | 0.8 | 3.2 | FAO, WHO 2011 |
| Ba | TDI | 12 |  | 0.2 | 0.2 |  | 0.3 | 0.5 |  | 0.2 | 0.3 | ATSDR 2007 |
| Cd | TWI | 0.2 |  | 6.4 | 9.6 |  | 4.4 | 11.6 |  | 5.6 | 18.6 | EFSA 2009b |
| Ni | PMTDI/TDI | 0.2 |  | 7.3 | 30.2 |  | 32.9 | 41.4 |  | 6.3 | 10.2 | EFSA 2015 |
| Pb | PTWI | 1.5 |  | 0.3 | 1.3 |  | 1.0 | 1.4 |  | 0.4 | 1.3 | JECFA 2011 |
|  |  |  |  |  |  |  |  |  |  |  |  |  |

PTWI provisional tolerable weekly intake; TDI tolerable daily intake; TWI tolerable weekly intake; PMTDI provisional maximum tolerable daily intake; DI daily intake; DRV dietary reference values; ADI adequate daily intake; TUI tolerable upper intake; WHS wheat straw; GMC grape marc; OLV olive leaves; OMW olive mill wastes. * For arsenic, as no limits exist in EU today, the PTWI of 15μg kg-1b.w. set by FAO/WHO was used, although it is no longer in use (EFSA 2009a)

**Table S3.** Percent coverage of adequate intakes for essential trace elements from the consumption of one serving (30 g) of dry *Pleurotus* mushrooms by a 60 kg adult

| Element | Type of established intake | Intake  (mg d-1) |  | *P. ostreatus* | |  | *P. eryngii* | |  | *P. nebrodensis* | | Reference |
| --- | --- | --- | --- | --- | --- | --- | --- | --- | --- | --- | --- | --- |
|  | WHS+ GMC | OLV+ OMW |  | WHS+ GMC | OLV+ OMW |  | WHS+ GMC | OLV+ OMW |
|  |  |  |  |  |  |  |  |  |  |  |  |  |
| Co | DI | 0.022 |  | 4.1 | 5.5 |  | 2.7 | 9.5 |  | 4.1 | 6.8 | USEPA 2000 |
| Cu | TDI | 30 |  | 5.3 | 3.5 |  | 0.4 | 1.2 |  | 1.2 | 4.3 | Mlezcek et al 2018 |
| Fe | TDI | 48 |  | 11.6 | 10.0 |  | 3.6 | 5.0 |  | 2.5 | 3.2 | Mlezcek et al 2018 |
| K | DRV | 3500 |  | 57.3 | 51.3 |  | 45.7 | 55.6 |  | 49.5 | 53.0 | EFSA 2017 |
| Mn | ADI | 3.0 |  | 10.7 | 14.6 |  | 7.9 | 9.7 |  | 10.8 | 10.2 | EFSA 2013 |
| Zn | TDI | 18-60 |  | 21-6.3 | 18-5.4 |  | 11-3.2 | 10-2.9 |  | 14-4.1 | 14-4.0 | Mlezcek et al 2018 |
| Na | TUI | 2300 |  | 1.0 | 1.0 |  | 1.0 | 1.2 |  | 0.9 | 0.8 | IOM 2001 |
|  |  |  |  |  |  |  |  |  |  |  |  |  |

DI daily intake; TDI tolerable daily intake;; DRV dietary reference values; ADI adequate daily intake; TUI tolerable upper intake; WHS wheat straw; GMC grape marc; OLV olive leaves; OMW olive mill wastes

**References**

ATSDR. 2007. Toxicological profile for barium and barium compounds. https://www.atsdr.cdc.gov/toxprofiles/tp24.pdf.

EFSA. 2009a. Scientific opinion of the panel on contaminants in the food chain. *The EFSA Journal* 980: 1–139. doi:10.2903/j.efsa.2009.1351.

EFSA. 2009b. Scientific opinion on arsenic in food. *EFSA Journal* 7 (10): 1351. doi:10.2903/j.efsa.2009.1351.

EFSA. 2013. Scientific opinion on dietary reference values for manganese. *EFSA Journal* 11 (11): 1–44. doi:10.2903/j.efsa.2013.3419.

EFSA. 2015. Scientific opinion on the risks to animal and public health and the environment related to the presence of nickel in feed. *EFSA Journal* 13 (4): 4074. doi:10.2903/j.efsa.2015.4074.

EFSA. 2017. Dietary reference values for nutrients summary report. 2017. *EFSA Supporting Publications* 14 (12). [doi:10.2903/sp.efsa.2017.e15121](https://doi.org/10.2903/sp.efsa.2017.e15121).

IOM, Institute of Medicine, Food and Nutrition Board. 2001. D*ietary reference intakes for vitamin a, vitamin k, arsenic, boron, chromium, copper, iodine, iron, manganese, molybdenum, nickel, silicon, vanadium, and zinc*. Washington, D.C.: National Academies Press. https://doi.org/10.17226/10026

JEFCA and WHO. 2011. *Safety evaluation of certain contaminants in food*. Prepared by the sixty-fourth meeting of the Joint FAO/WHO Expert Committee on Food Additives (JECFA). Vol. 82. Geneva: World Health Organization. Accessed December 28 2018 http://apps.who.int/iris/bitstream/handle/10665/44520/9789241660631_eng.pdf?sequence=1.

JECFA. 2012. Safety evaluation of certain food additives - Seventy-fourth meeting of the JECFA. *WHO Food Additives Series* 65. https://doi.org/10.1016/S0168-1605(03)00167-3.

Mleczek, M., P. Rzymski, A. Budka, M. Siwulski, A. Jasińska, P. Kalač, B. Poniedziałek, M. Gąsecka, and P. Niedzielski. 2018. Elemental characteristics of mushroom species cultivated in China and Poland. *Journal of Food Composition and Analysis* 66 (December 2017):168–178. https://doi.org/10.1016/j.jfca.2017.12.018.

1. * Nick Kalogeropoulos, [nickal@hua.gr](mailto:nickal@hua.gr), El. Venizelou 70, Kallithea, 176 76, Athens, Greece. [↑](#footnote-ref-2)
